# Supplementary material for: Water Quality Assessment and Potential Source Contribution Using Multivariate Statistical Techniques in Jinwi River Watershed, South Korea
Source: MDPI journal article supplement (doi:10.3390/w13212976), 2021-10-21
Supplement: s1 [file s1]

Archive with 1 entries (1 files):
- water-1407373-supplementary.pdf
