# Supplementary material for: Water Quality Assessment and Potential Source Contribution Using Multivariate Statistical Techniques in Jinwi River Watershed, South Korea
Source: MDPI journal article supplement (doi:10.3390/w13212976), 2021-10-21
Supplement: s1 [file s1 › water-1407373-supplementary.pdf]

Supplementary Material

# Water Quality Assessment and Potential Source Contribution Using Multivariate Statistical Techniques in Jinwi River Watershed, South Korea

Hyeonmi Choi, Yong-Chul Cho, Sang-Hun Kim, Soon-Ju Yu, Young-Seuk Kim \* and Jong-Kwon Im \*

National Institute of Environmental Research, Han River Environment Research Center, 42 Dumulmeori-gil 68beon-gil, Yangseo-myeon, Yangpyeong-gun, Gyeonggi-do, 12585, Korea

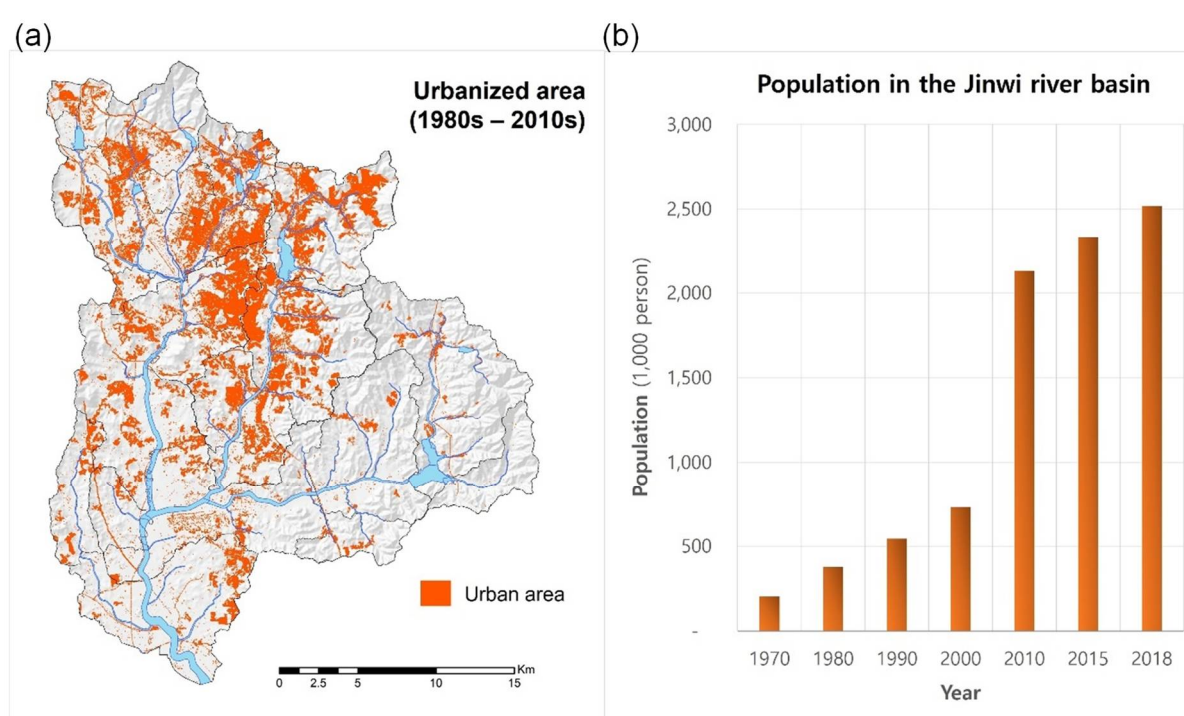

**Figure S1.** Urbanized area (1980s–2010s) (a) and population change (b) in the Jinwi River watershed [1,2].

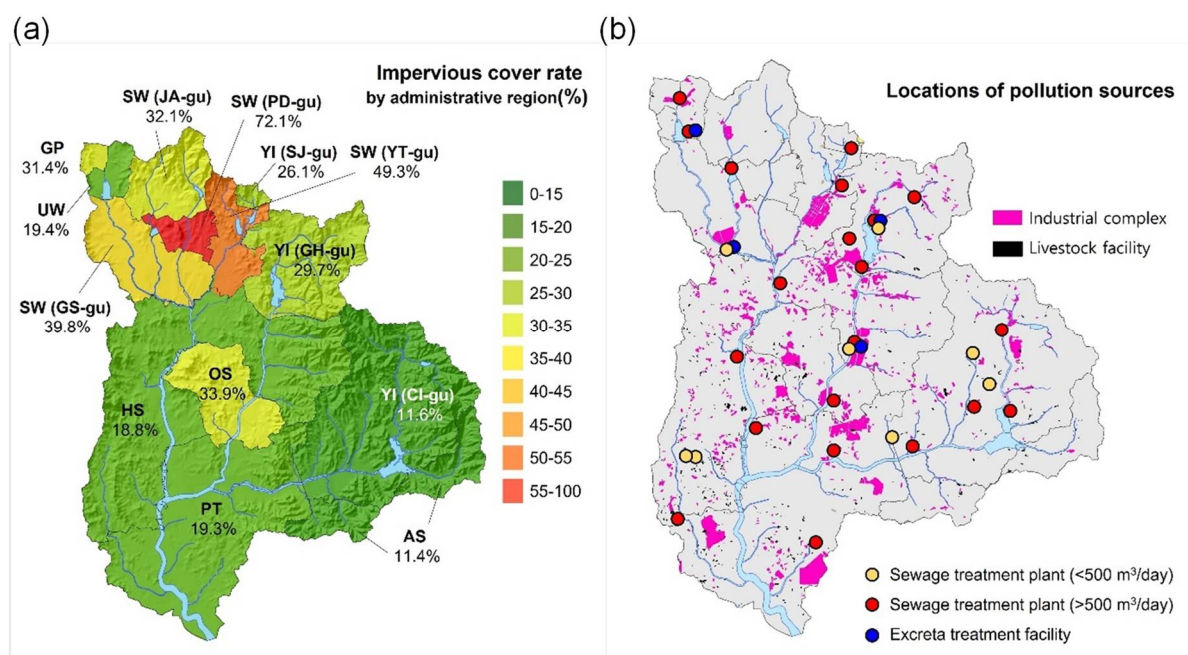

**Figure S2.** Impervious cover rate (a) and locations of pollution sources (b) in the Jinwi River watershed [1,3].

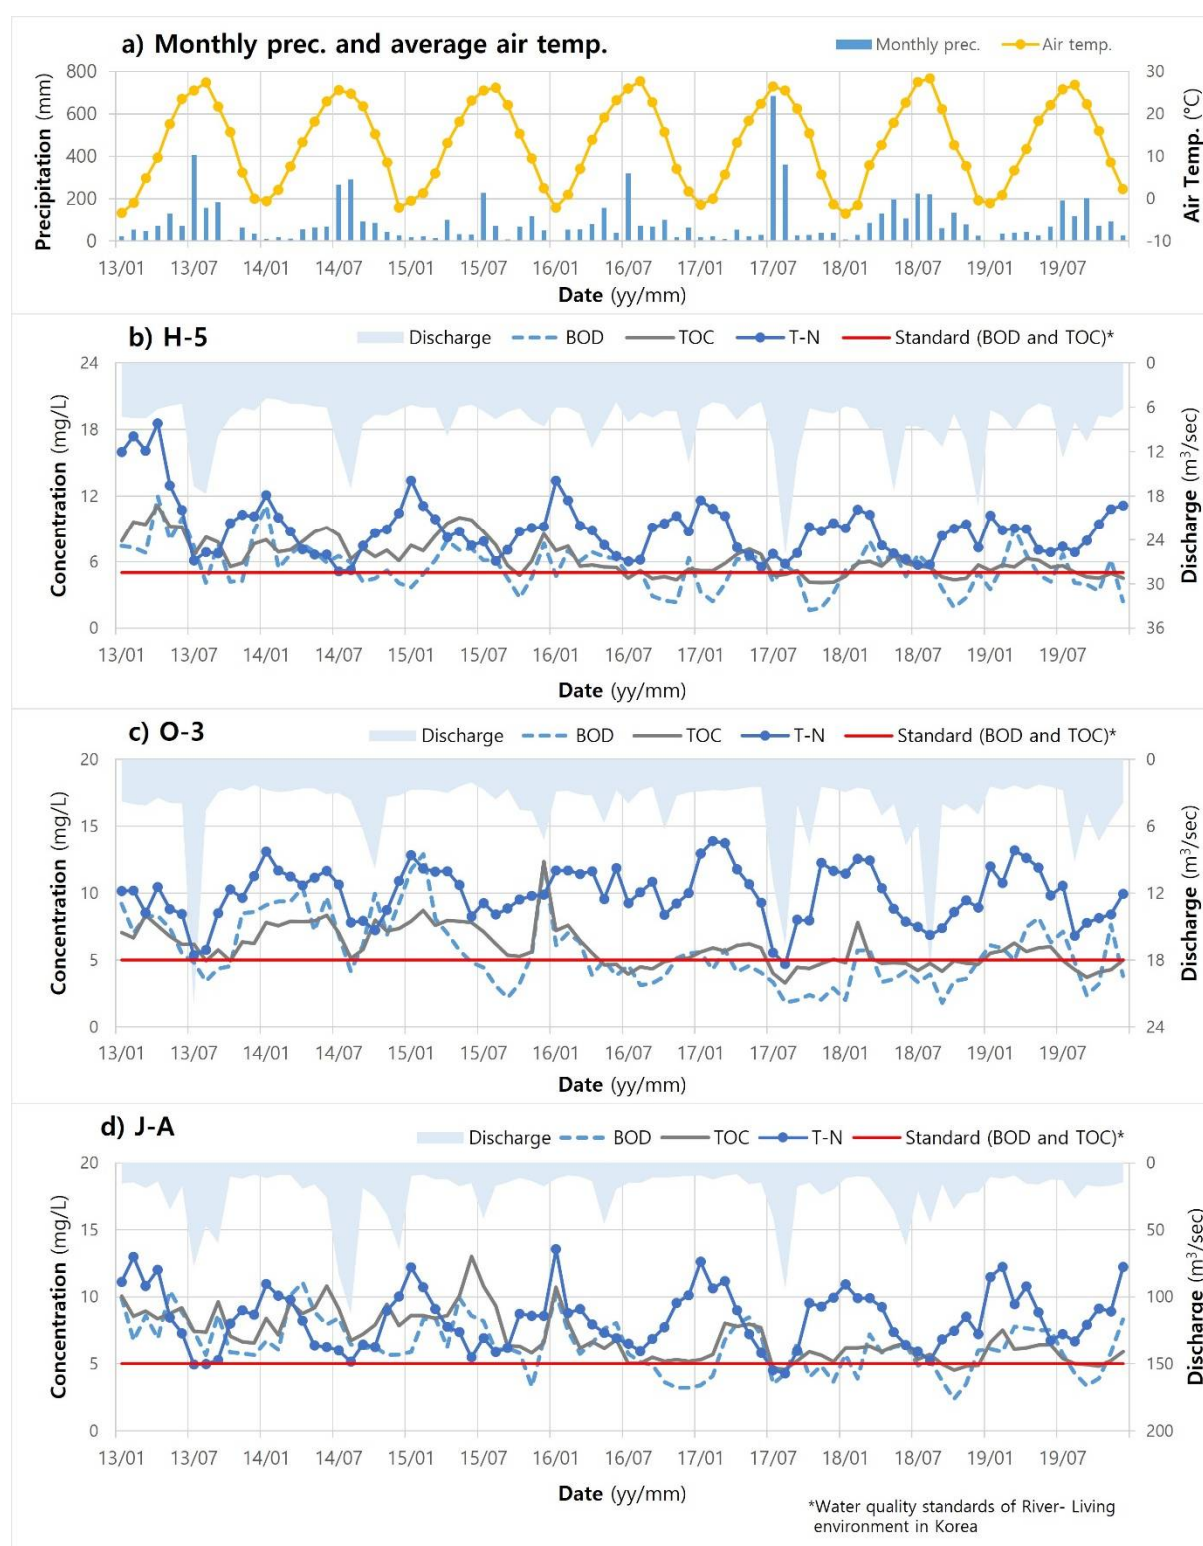

**Figure S3.** Monthly precipitation and air temperature data from (a) Suwon weather station, and changes of water quality concentration and discharge at (b) H-5, (c) O-3 and (d) J-A.

**Table S1.** List of monitoring sites in the Jinwi River Basin and their characteristics.

| Site | Drainage area (km <sup>2</sup> ) | Boundary between cities | TM coordinates |            |
|------|----------------------------------|-------------------------|----------------|------------|
|      |                                  |                         | X              | Y          |
| J-1  | 20.57                            | Anseong - Yongin        | 219863.786     | 500892.545 |
| S-T  | 15.57                            | Anseong - Yongin        | 212980.152     | 499155.883 |
| J-2  | 135.53                           | Yongin - Pyeongtaek     | 210642.764     | 500071.279 |
| O-1  | 57.16                            | Yongin - Hwaseong       | 208057.620     | 512726.384 |
| O-2  | 52.89                            | Hwaseong - Osan         | 206985.257     | 506565.967 |
| O-3  | 27.23                            | Osan - Pyeongtaek       | 205185.963     | 503441.802 |
| H-1  | 4.23                             | Gunpo - Uiwang          | 284082.364     | 525044.353 |
| H-2  | 10.92                            | Uiwang - Suwon          | 283891.212     | 522492.551 |
| H-3  | 154.47                           | Suwon - Hwaseong        | 202263.735     | 511594.516 |
| H-4  | 21.95                            | Osan - Hwaseong         | 200828.773     | 509402.372 |
| H-5  | 52.46                            | Hwaseong - Pyeongtaek   | 200128.372     | 502204.015 |
| J-3  | 99.72                            | Hwaseong - Pyeongtaek   | 288373.416     | 498143.720 |
| G-T  | 20.5                             | Hwaseong - Pyeongtaek   | 284982.604     | 496323.776 |
| J-A  | 61.08                            | End of the Jinwi River  | 201684.668     | 546122.857 |

Table S2. Information of analytical methods and instruments.

| Parameters    | Unit              | Analytical methods                    | Analytical Instrument                                                                                    | QA/QC [4]                                                   |
|---------------|-------------------|---------------------------------------|----------------------------------------------------------------------------------------------------------|-------------------------------------------------------------|
| WT            | °C                | Temperature probe                     | 600 XLM (YSI, Yellow Springs, OH, USA)                                                                   | -                                                           |
| pH            | -                 | pH probe                              | 600 XLM (YSI, Yellow Springs, OH, USA)                                                                   | -                                                           |
| EC            | µS/cm             | Conductometry                         | 600 XLM (YSI, Yellow Springs, OH, USA)                                                                   | Precision: *RSD ≤ ±20%                                      |
| DO            | mg/L              | DO probe                              | 600 XLM (YSI, Yellow Springs, OH, USA)                                                                   | **LOQ: 0.5 mg/L<br>Accuracy: 95–105%                        |
| BOD           | mg/L              | Winkler azide method                  | 5100 DO Meter (YSI, Yellow Springs, OH, USA),<br>BOD Incubator (VISION Scientific, Bucheon, South Korea) | Precision: RSD ≤ ±15%<br>Accuracy: 95–105%                  |
| COD           | mg/L              | KMnO <sub>4</sub> method              | Water Bath (100 °C Acid)                                                                                 | Precision: RSD ≤ ±25%<br>Accuracy: 75–125%                  |
| SS            | mg/L              | Gravimetric                           | GF/C Filter (Whatman, Maidstone, UK)                                                                     | -                                                           |
| T-N           | mg/L              | Continuous flow analysis              | AACS_VI (BLTEC, Tokyo, Japan)                                                                            | LOQ: 0.06 mg/L<br>Precision: RSD ≤ ±25%                     |
| T-P           | mg/L              | Continuous flow analysis              | AACS_VI (BLTEC, Tokyo, Japan)                                                                            | LOQ: 0.003 mg/L<br>Precision: RSD ≤ ±25%                    |
| TOC           | mg/L              | High temperature combustion oxidation | TOC-LCPH (Shimadzu, Tokyo, Japan)                                                                        | LOQ: 0.3 mg/L<br>Precision: RSD ≤ ±20%<br>Accuracy: 80–120% |
| Chl- <i>a</i> | mg/m <sup>3</sup> | UV-Visible Spectrophotometer          | Agilent technologies (AU/Carry 3500, Santa Clara, CA, USA)                                               | -                                                           |

\*RSD: Relative standard deviation.

\*\*LOQ: Limit of quantitation.

**Table S3.** Water quality parameters and scores.

| Parameter                           | Score range |       |       |       |        |        |             |
|-------------------------------------|-------------|-------|-------|-------|--------|--------|-------------|
|                                     | 1           | 2     | 3     | 4     | 5      | 6      | 7           |
| BOD (mg/L) *                        | ≤1          | ≤2    | ≤3    | ≤5    | ≤8     | ≤10    | above 10    |
| COD (mg/L) *                        | ≤2          | ≤4    | ≤5    | ≤7    | ≤9     | ≤11    | above 11    |
| T-P (mg/L) *                        | ≤0.02       | ≤0.04 | ≤0.1  | ≤0.2  | ≤0.3   | ≤0.5   | above 0.5   |
| TOC (mg/L) *                        | ≤2          | ≤3    | ≤4    | ≤5    | ≤6     | ≤8     | above 8     |
| BOD load<br>(kg/d/km <sup>2</sup> ) | ≤1.6        | ≤1.9  | ≤3.3  | ≤10.5 | ≤77.6  | ≤171.1 | above 171.1 |
| COD load<br>(kg/d/km <sup>2</sup> ) | ≤4.3        | ≤5.0  | ≤10.4 | ≤23.7 | ≤132.2 | ≤310.0 | above 310.0 |
| T-N load<br>(kg/d/km <sup>2</sup> ) | ≤1.7        | ≤1.8  | ≤4.9  | ≤21   | ≤102.3 | ≤199.1 | above 199.1 |
| T-P load<br>(kg/d/km <sup>2</sup> ) | ≤0.06       | ≤0.08 | ≤0.17 | ≤0.65 | ≤6.77  | ≤12.55 | above 12.55 |
| TOC load<br>(kg/d/km <sup>2</sup> ) | ≤2.6        | ≤3.0  | ≤6.1  | ≤15.6 | ≤84.6  | ≤196.8 | above 196.8 |

\* Water quality standards of river-living environment in Korea [5].

**Table S4.** Information of water quality index.

- Water quality range for RTWQI [6]

| Parameter         | Range                                                                                                                                |
|-------------------|--------------------------------------------------------------------------------------------------------------------------------------|
| Water temperature | Monthly average for 10 year – 10 °C ≤ WT(°C) ≤ Monthly average for 10 year + 10 °C                                                   |
| pH                | 6.5 ≤ pH ≤ 9.0                                                                                                                       |
| DO                | 0.8 × DO saturation concentration at present water temperature ≤ DO ≤ 1.3 × DO saturation concentration at present water temperature |
| EC                | EC ≤ 300 µS/cm                                                                                                                       |
| SS                | SS ≤ 25 mg/L                                                                                                                         |
| T-N               | T-N ≤ 3.0 mg/L                                                                                                                       |
| T-P               | T-P ≤ 0.1 mg/L                                                                                                                       |
| TOC               | TOC ≤ 3.0 mg/L                                                                                                                       |

- The mathematical formulation of RTWQI is given below:

$$RTWQI = 100 - \left( \sqrt{\frac{F_1^2 + F_2^2 + F_3^2}{3}} \right)$$

where F1 is the number of variables whose objectives are not met (failed variables), F2 is the percentage of individual tests that do not meet objectives (failed tests), F3 is the amount by which failed test values do not meet their objectives and is then calculated by an asymptotic function that scales the normalized sum of the excursions from objectives to yield a range between 0 and 100 [6,7].

- Descriptions of scores and grades of RTWQI [7].

| RTWQI  |           | Description                                                                                                                               |
|--------|-----------|-------------------------------------------------------------------------------------------------------------------------------------------|
| Score  | Grade     |                                                                                                                                           |
| 80–100 | Excellent | Water quality is protected with a virtual absence of threat or impairment; conditions very close to natural or pristine levels.           |
| 60–79  | Good      | Water quality is protected with only a minor degree of threat or impairment; conditions rarely depart from natural or desirable levels.   |
| 40–59  | Fair      | Water quality is usually protected but occasionally threatened or impaired; conditions sometimes depart from natural or desirable levels. |
| 20–39  | Poor      | Water quality is frequently threatened or impaired; conditions often depart from natural or desirable levels.                             |
| 0–19   | Very poor | Water quality is almost always threatened or impaired; conditions usually depart from natural or desirable levels.                        |

**Table S5.** Seven-year average value in the dry season and the wet season on monitoring site.

| Site                        | WT<br>(°C) | pH  | EC<br>(µS/cm) | DO<br>(mg/L) | BOD<br>(mg/L) | COD<br>(mg/L) | SS<br>(mg/L) | T-N<br>(mg/L) | T-P<br>(mg/L) | TOC<br>(mg/L) | Chl- <i>a</i><br>(mg/m <sup>3</sup> ) | D<br>(m <sup>3</sup> /s) |
|-----------------------------|------------|-----|---------------|--------------|---------------|---------------|--------------|---------------|---------------|---------------|---------------------------------------|--------------------------|
| Dry season (April–June)     |            |     |               |              |               |               |              |               |               |               |                                       |                          |
| J-1                         | 18.5       | 7.9 | 247           | 9.9          | 1.2           | 4.7           | 8.1          | 2.135         | 0.051         | 2.8           | 4.2                                   | 0.188                    |
| S-T                         | 19.1       | 7.6 | 355           | 10.2         | 2.6           | 6.4           | 14.4         | 2.297         | 0.106         | 3.7           | 8.0                                   | 0.131                    |
| J-2                         | 21.5       | 8.1 | 315           | 11.6         | 2.2           | 6.6           | 12.3         | 2.233         | 0.094         | 4.0           | 9.7                                   | 1.383                    |
| O-1                         | 24.4       | 7.4 | 2668          | 9.0          | 1.6           | 7.0           | 6.4          | 11.171        | 0.227         | 5.0           | 6.2                                   | 0.941                    |
| O-2                         | 21.8       | 7.8 | 1563          | 10.0         | 2.8           | 6.9           | 18.0         | 7.195         | 0.246         | 4.5           | 19.9                                  | 1.908                    |
| O-3                         | 22.5       | 7.5 | 1163          | 9.4          | 5.9           | 9.7           | 13.9         | 10.372        | 0.566         | 6.3           | 14.6                                  | 3.371                    |
| H-1                         | 20.2       | 7.7 | 513           | 10.3         | 3.4           | 7.8           | 13.5         | 9.004         | 0.185         | 5.2           | 10.1                                  | 0.106                    |
| H-2                         | 21.2       | 8.7 | 471           | 11.8         | 7.8           | 14.7          | 30.3         | 3.426         | 0.147         | 7.2           | 0.1                                   | 0.102                    |
| H-3                         | 22.7       | 7.3 | 1149          | 8.1          | 8.2           | 12.2          | 17.3         | 9.236         | 0.655         | 7.6           | 8.1                                   | 8.085                    |
| H-4                         | 22.6       | 7.3 | 1263          | 7.2          | 6.2           | 11.4          | 12.9         | 8.946         | 0.612         | 7.3           | 8.4                                   | 8.441                    |
| H-5                         | 23.0       | 7.7 | 1170          | 9.5          | 6.9           | 11.8          | 19.0         | 8.234         | 0.634         | 7.5           | 44.4                                  | 7.283                    |
| J-3                         | 21.3       | 7.7 | 1050          | 9.2          | 6.9           | 11.5          | 21.1         | 7.896         | 0.535         | 7.2           | 50.9                                  | 15.121                   |
| G-T                         | 22.9       | 8.0 | 788           | 9.5          | 6.0           | 12.6          | 17.5         | 5.512         | 0.255         | 8.2           | 26.6                                  | 0.492                    |
| J-A                         | 20.7       | 7.8 | 1053          | 8.8          | 7.9           | 12.9          | 20.9         | 7.747         | 0.479         | 8.0           | 81.5                                  | 21.623                   |
| Wet season (July–September) |            |     |               |              |               |               |              |               |               |               |                                       |                          |
| J-1                         | 23.4       | 7.8 | 225           | 8.2          | 0.9           | 4.0           | 6.0          | 1.876         | 0.046         | 2.3           | 3.9                                   | 0.418                    |
| S-T                         | 24.4       | 7.6 | 346           | 8.8          | 1.4           | 5.1           | 6.0          | 2.506         | 0.087         | 3.1           | 2.6                                   | 0.246                    |
| J-2                         | 25.7       | 7.7 | 293           | 9.7          | 1.2           | 5.0           | 7.0          | 2.027         | 0.063         | 3.1           | 6.4                                   | 3.480                    |
| O-1                         | 27.9       | 7.5 | 2298          | 8.2          | 1.4           | 6.4           | 8.0          | 10.093        | 0.183         | 4.3           | 7.1                                   | 1.734                    |
| O-2                         | 26.1       | 7.7 | 1249          | 9.1          | 1.9           | 5.9           | 19.2         | 5.910         | 0.209         | 3.8           | 17.9                                  | 4.508                    |
| O-3                         | 26.9       | 7.5 | 999           | 8.6          | 3.9           | 7.7           | 16.7         | 7.991         | 0.445         | 5.0           | 7.6                                   | 6.564                    |
| H-1                         | 24.7       | 7.7 | 481           | 8.8          | 3.1           | 7.1           | 22.2         | 7.466         | 0.257         | 4.6           | 5.9                                   | 0.440                    |
| H-2                         | 26.4       | 8.6 | 313           | 10.3         | 7.7           | 19.3          | 35.3         | 2.151         | 0.165         | 7.4           | 1.4                                   | 0.366                    |
| H-3                         | 27.2       | 7.5 | 1028          | 7.5          | 7.2           | 10.1          | 15.6         | 7.732         | 0.514         | 6.1           | 13.2                                  | 11.435                   |
| H-4                         | 27.5       | 7.4 | 1162          | 7.0          | 5.6           | 9.7           | 12.0         | 7.175         | 0.575         | 5.9           | 20.2                                  | 11.871                   |
| H-5                         | 27.6       | 7.8 | 1019          | 8.9          | 5.3           | 10.0          | 16.9         | 6.726         | 0.494         | 6.0           | 37.1                                  | 11.173                   |
| J-3                         | 26.7       | 7.7 | 898           | 8.6          | 5.2           | 9.7           | 23.1         | 5.999         | 0.440         | 6.0           | 34.5                                  | 26.465                   |
| G-T                         | 26.9       | 7.9 | 569           | 8.6          | 4.0           | 9.2           | 22.2         | 4.172         | 0.289         | 5.6           | 13.2                                  | 0.875                    |

---

|     |      |     |     |     |     |      |      |       |       |     |      |        |
|-----|------|-----|-----|-----|-----|------|------|-------|-------|-----|------|--------|
| J-A | 26.3 | 7.7 | 863 | 7.9 | 5.7 | 10.4 | 27.3 | 5.985 | 0.431 | 6.4 | 55.1 | 38.207 |
|-----|------|-----|-----|-----|-----|------|------|-------|-------|-----|------|--------|

---

## References

1. Ministry of Environment (MOE). Environmental Geographic Information Service (EGIS). Available online: <http://www.egis.me.go.kr> (accessed on 2 July 2021).
2. Han River Flood Control Office (HRFCO). Water Resources Management Information System (WAMIS). Population in the standard catchment. Available online; <http://www.wamis.go.kr> (accessed 15 May 2021).
3. Ministry of Environment (MOE). *2019 Statistics of Sewerage*; Ministry of Environment: Sejong, Korea, 2020; p. 3133.
4. Ministry of Environment (MOE). *Official Testing Method with Respect to Water Pollution Process*; National Institute of Environmental Research (NIER): Incheon, Korea, 2018.
5. Ministry of Environment (MOE). Water Quality Standards of River-Living Environment. Available online: <http://www.me.go.kr> (accessed on 4 April 2021).
6. Ministry of Environment (MOE). *User's Manual of Real-Time Water Quality Information System*; National Institute of Environmental Research (NIER): Incheon, Korea, 2013; p. 21.
7. Bilgin, A. Evaluation of surface water quality by using Canadian Council of Ministers of the Environment Water Quality Index (CCME WQI) method and discriminant analysis method: A case study Coruh River Basin. *Environ. Monit. Assess.* **2018**, *190*, 554.
